# Supplementary material
Source: Copernicus journal article supplement (doi:10.5194/egusphere-2025-1476)
Supplement: Supplementary file [file egusphere-2025-1476-AC3-supplement.pdf]

Dear editor,

We thank you for checking the compliability of our manuscript and acknowledge you have a fair point regarding the reusability of our code and data.

To make our work comply with your code and data policy, we will upload the used CESM(CAM) code, feedback controller code and WACCM analysis code as well as links to the relevant data to the repository and publish the repository in a permanent store with a DOI.

We hope this is sufficient to solve the issue.

Kind regards,

Jasper de Jong (on behalf of all authors)
